# Supplementary material for: Proportion of High-Risk/Very High-Risk Patients in Europe with Low-Density Lipoprotein Cholesterol at Target According to European Guidelines: A Systematic Review
Source: PubMed Central journal article supplement — Adv Ther. 2020 Mar 21;37(5):1724–36. doi: 10.1007/s12325-020-01285-2 (PMC7467492; doi:10.1007/s12325-020-01285-2), 2020-03-21
Supplement: 12325_2020_1285_MOESM1_ESM.pdf [file 12325_2020_1285_MOESM1_ESM.pdf]

## SUPPLEMENTARY MATERIAL

### Appendix 1. Search Terms

Key: mh = exploded MeSH: Medical subject heading (Medline medical index term); tw = text word; pt = publication type; the asterisk (\*) stands for any character(s)

#### DM

- 1 exp Diabetes Mellitus/
- 2 diabet\$.tw, ot.
- 3 (IDDM or NIDDM or MODY or T1DM or T2DM or T1D or T2D).tw,ot.
- 4 (non insulin\$ depend\$ or noninsulin\$ depend\$ or non insulin?depend\$ or noninsulin?depend\$).tw,ot.
- 5 (insulin\$ depend\$ or insulin?depend\$).tw,ot.
- 6 or/1-5

#### CVD

- 7 exp Cardiovascular Diseases/
- 8 cardio\*.tw.
- 9 cardia\*.tw.
- 10 heart\*.tw.
- 11 coronary\*.tw.
- 12 angina\*.tw.
- 13 ventric\*.tw.
- 14 myocard\*.tw.
- 15 pericard\*.tw.
- 16 isch?em\*.tw.
- 17 exp Stroke/
- 18 (stroke or stokes).tw.
- 19 cerebrovasc\*.tw.
- 20 (brain adj2 accident\*).tw.
- 21 ((brain\* or cerebral or lacunar) adj2 infarct\*).tw.
- 22 or/7-21

### **Familial hypercholesterolaemia**

- 23 familial hypercholesterolemia.tw,ot.
- 24 familial hypercholesterolaemia.tw,ot.
- 25 FH
- 26 heterozygous familial hypercholesterolemia.tw,ot.
- 27 heterozygous familial hypercholesterolaemia.tw,ot.
- 28 heterozygous FH.tw,ot.
- 29 familial combined hyperlipidaemia
- 30 familial combined hyperlipidemia
- 31 FCH
- 32 FCHL
- 33 Mixed hyperlipidaemia
- 34 mixed hyperlipidemia
- 35 Genetic hypercholesterolemia
- 36 Genetic hypercholesterolaemia
- 37 or/23-36

### **SCORE**

- 38 Score.tw,ot.
- 39 systematic coronary risk evaluation.tw,ot.
- 40 or/38-39

### **LDL**

- 41 Cholesterol.tw,ot.
- 42 lipid.tw,ot.
- 43 LDL-cholesterol.tw,ot.

- 44 non-HDL cholesterol.tw,ot.
- 45 non HDL cholesterol
- 46 LDL Cholesterol.tw,ot.
- 47 Low Density Lipoprotein Cholesterol.tw,ot.
- 48 beta-Lipoprotein Cholesterol.tw,ot.
- 49 beta Lipoprotein Cholesterol.tw,ot.
- 50 LDL Cholesteryl Linoleate.tw,ot.
- 51 or/41-50

**Observational studies**

- 52 Epidemiologic Studies/
- 53 exp Case-Control Studies/
- 54 exp Cohort Studies/
- 55 Cross-Sectional Studies/
- 56 (epidemiologic adj (study or studies)).ab,ti.
- 57 case control.ab,ti.
- 58 (cohort adj (study or studies)).ab,ti.
- 59 cross sectional.ab,ti.
- 60 cohort analy\$.ab,ti.
- 61 (follow up adj (study or studies)).ab,ti.
- 62 longitudinal.ab,ti.
- 63 retrospective\$.ab,ti.
- 64 prospective\$.ab,ti.
- 65 (observ\$ adj3 (study or studies)).ab,ti.
- 66 adverse effect?.ab,ti.
- 67 or/52-66

**Overall search**

68 6, 22, 37, 40

69 68 AND 51 AND 67

## Appendix 2. Evidence table

| Study by risk group              | n    | Age, years  | Men, % | LDL-C, mmol/L (mg/dL) | LDL-C goal achievement (%) | Statin treatment (%) | Any lipid lowering treatment (%) | Active smoking (%) | Hypertension (%) | Diabetes (%) | BMI (kg/m <sup>2</sup> ) |
|----------------------------------|------|-------------|--------|-----------------------|----------------------------|----------------------|----------------------------------|--------------------|------------------|--------------|--------------------------|
| <b>Clinical CVD</b>              |      |             |        |                       |                            |                      |                                  |                    |                  |              |                          |
| 2L cardio registry <sup>51</sup> | 6711 | 65.6 (10.1) | 70.6   | 100.5 (85.0-123.0)    | <2.6: 48.7                 | 100                  | 100                              | 15.6               | 75.8             | 36.5         | 28.5 (4.3)               |
| ADRIE study <sup>52</sup>        | 771  | 62.9 (12.1) | 81     | NA                    | <2.6: 64                   | 89                   | NA                               | 75                 | 57               | 22           | 26.4 (4.2)               |
| ARTEMIS <sup>53</sup>            | 1490 | 66.0 (9.0)  | 69.5   | 2.3 (0.8)             | NA                         | 90.9                 | NA                               | 9                  | 81               | 55.7         | 26.6 (3.6)               |
| ASPIRE-S <sup>54</sup>           | 302  | 69.1 (12.8) | 57.3   | 2.1 (0.88)            | <2.5: 77; <1.8: 56         |                      | 94.5                             | 28.1               | 57               | 19.9         | 26.8 (4.5)               |
| ATHEROREMO-IVUS <sup>55</sup>    | 581  | 61.5 (11.3) | 75.5   | 2.72 (2.12-3.54)      | NA                         | 62.3                 | NA                               | 29.0               | 52.1             | 17.2         | NA                       |
| Back et al <sup>56</sup>         | 332  | 65 (9.1)    | 77.5   | 2.3 (1.9-2.7)         | NA                         | NA                   | 94.9                             | 18.8               | 47.9             | 17.6         |                          |
| Brath et al <sup>57</sup>        | 921  | NA          | NA     | NA                    | <1.8: 38.5; <2.6: 76.3     | 96.4                 | 99.9                             | NA                 | NA               | 100          | NA                       |
| CEPHEUS CVD <sup>58</sup>        | NA   | NA          | NA     | NA                    | <2.5: 55.9                 | NA                   | NA                               | NA                 | NA               | NA           | NA                       |
| CEPHEUS FH <sup>58</sup>         | NA   | NA          | NA     | NA                    | <2.5: 44.2                 | NA                   | NA                               | NA                 | NA               | NA           | NA                       |
| CIBAR study <sup>59</sup>        | 1848 | 69.2 (11.1) | 72     | NA                    | <100: 41                   | 87.3                 | 88.1                             | 9.9                | 65.5             | 28.7         | 39.40%                   |

|                                                         |                        |                       |      |                           |                           |      |      |      |      |                |                         |
|---------------------------------------------------------|------------------------|-----------------------|------|---------------------------|---------------------------|------|------|------|------|----------------|-------------------------|
| Citarella et al <sup>60</sup>                           | 10417                  |                       | 60.6 | NA                        | <2.6: 10.9                | 100  | 100  |      | 85.0 | 18.6           | NA                      |
| CLARIFY <sup>61</sup>                                   | 12294                  | 66.1<br>(10.0)        | 78.8 | 2.4 (1.9-<br>2.9)         | <1.8: 20.1; <2.6:<br>61.5 |      | 92.5 | 11.6 | 69.8 | 3272<br>(26.6) | 27.7<br>(25.4-<br>30.5) |
| Co-Laue study <sup>62</sup>                             | 303                    | NA                    | NA   | NA                        | <1.8: 54.7                | NA   | 53.2 | NA   | NA   | NA             | NA                      |
| Copenhagen<br>General Population<br>Study <sup>63</sup> | 1521                   | NA                    | NA   | NA                        | <2.5: 55.3                | NA   | 70   | NA   | NA   | NA             | NA                      |
| Cordero et al <sup>64</sup>                             | 1583<br>(2006)         | 66.8<br>(11.4)        | 73   | 112.3<br>(36.2)           | <1.8: 9.5                 | 69   | NA   | 12.3 | 67   | 38             | 28.2±3.9                |
| Cordero et al <sup>64</sup>                             | 1110<br>(2014)         | 66.7<br>(10.4)        | 80.8 | 98.0<br>(43.7)            | <1.8: 27.3                | 96   | NA   | 15.4 | 62.6 | 34.5           | 28.6±4.5                |
| Do Rego et al <sup>65</sup>                             | 1240 (with<br>MS)      | 64.6<br>(11.0)        | NA   | 112 (89-<br>140)          | <1.8: 10.9                | 93.5 | NA   | NA   | NA   | NA             | NA                      |
| Do Rego et al <sup>65</sup>                             | 361<br>(without<br>MS) | 64.6<br>(11.0)        | NA   | 105.0<br>(86.2-<br>130.0) | <1.8: 12.2                | 89.3 | NA   | NA   | NA   | NA             | NA                      |
| EDICONDIS-<br>ULISEA                                    | 329                    | NA                    | NA   | NA                        | <1.8: 65.3                |      | NA   | NA   | NA   | NA             | NA                      |
| ELDERCIC study,<br>>65 <sup>66</sup>                    | 524                    | 73.3<br>(5.3)         | 66.9 | NA                        | <1.8: 42.4                | 82.8 | NA   | 14.3 | 75.9 | 32             | 29.1 (4.3)              |
| ELDERCIC study, ≤<br>65 <sup>66</sup>                   | 514                    | 55.6<br>(6.8)         | 75.7 | NA                        | <1.8: 46.5                | 83.1 | NA   | 25.6 | 60.4 | 28.7           | 28.3 (4.1)              |
| EUROASPIRE III <sup>67</sup>                            | 13935                  | 61.9<br>(10.0)        | 72.6 | 2.77<br>(0.99)            | NA                        | 78   | NA   | 17.2 | NA   | NA             | 28.9 (4.5)              |
| EUROASPIRE IV <sup>16</sup>                             | 6648                   | 68.4%<br>≥60<br>years | 75.6 | NA                        | <1.8: 19.3; <2.5:<br>57.8 | 86   | NA   | 15.6 | NA   | 25.7           | 37.10%                  |

|                                                |                               |                |      |                   |                                       |      |      |      |      |      |                |
|------------------------------------------------|-------------------------------|----------------|------|-------------------|---------------------------------------|------|------|------|------|------|----------------|
| Ferreras Amez <sup>68</sup>                    | 4087                          | 67.7<br>(0.5)  | 73.8 | 118.3<br>(36.2)   | <2.6: 30.4                            | NA   | NA   | 35.5 | 89.5 | 50.5 | 28.8<br>(4.36) |
| Frigola-Capell et al <sup>69</sup>             | 722                           | 72 (12)        | 63%  | 104.04<br>(28.64) | <2.6: 23.5                            | 69.5 | NA   | 7.5  | 61.2 | NA   | NA             |
| Garzon et al <sup>70</sup>                     | 9647                          | 73.2           | 64.8 | NA                | <2.6: 75.3                            | NA   | NA   | 16.8 |      | 100  |                |
| Gencer et al <sup>71</sup>                     | 1602                          | 61.8<br>(11.9) | 81   | NA                | <1.8: 35; <2.6: 72                    | 94   | NA   | 52   | 53   | 16   | 339<br>(21%)   |
| Git et al <sup>72</sup>                        | 3273                          | 66.1<br>(10.2) | 70.4 | 2.7               | <1.8: 9.0; <2.6:<br>52.4              | 82.0 | NA   | 16.5 | 88.5 | 15.1 | 28.0 (4.0)     |
| Homburg Cream<br>and Sugar Study <sup>73</sup> | 502                           | 68 (59-<br>74) | 83.3 | 100 (80-<br>129)  | NA                                    | NA   | NA   | 18.8 | 92.7 | 32.7 | 28 (26-<br>31) |
| ICP-Bypass study <sup>74</sup>                 | 771                           | 67.7<br>(9.6)  | 71.4 | 93.5<br>(35.1)    | <1.8: 26.6; <2.6:<br>64.4             | 93.6 | 771  | 8.0  | 78.1 | 100  | 29.1 (4.5)     |
| Jameson et al <sup>75</sup>                    | 1773 (CHD<br>or ASCVD)        | 69.1<br>(10.2) | 65.5 | 2.30<br>(0.83)    | <2.5: 74.5                            | 100  | 100  | NA   | NA   | 0    | NA             |
| Jameson et al <sup>75</sup>                    | 468 (CHD<br>or ASCVD<br>+ DM) | 69.2<br>(9.7)  | 63.5 | 2.15<br>(0.78)    | <2.5: 81.4                            | 100  | 100  | NA   | NA   | 100  | NA             |
| Jankowski et al <sup>76</sup>                  | 640                           | 61.1<br>(8.9)  | 71.1 | NA                | <2.5: 61.5; <2.0:<br>32.1; <1.8: 21.6 | 94.5 | 95.6 | 19.7 | 48.2 | 13   | 33             |
| Jankowski et al <sup>76</sup>                  | 466                           | 65.9<br>(9.9)  | 60.7 | NA                | <2.5: 63.4; <2.0:<br>38.1; <1.8: 29.7 | 94.0 | 94.4 | 17   | 35.4 | 12.4 | 26.8           |
| Laforest et al <sup>77</sup>                   | 1201                          | 68.4<br>(9.8)  | 73.7 | NA                | <2.6: 51                              | 100  | 100  | 11.5 | 80   | 42.8 | 30.70%         |
| Libungan et al <sup>78</sup>                   | 402                           | 65.0<br>(9.4)  | 77   | NA                | <2.5: 60                              |      | 94   | 23   | 48   | 18   |                |
| LifeLines Cohort<br>study <sup>79</sup>        | 1302                          | 63 (12)        | 68.4 | 2.8 (0.9)         | NA                                    | NA   | 69   | 19.1 | 33.6 | 11.7 | 28 (4.1)       |

|                                     |                 |             |      |              |                        |      |      |      |      |      |            |
|-------------------------------------|-----------------|-------------|------|--------------|------------------------|------|------|------|------|------|------------|
| LIMA registry <sup>80</sup>         | 4884 (CHD)      | 65.2 (10.5) | 66.1 | 2.7          | <1.8: 7.5; <2.6: 48.9  | 100  | 100  | NA   | NA   | 0    | 27.8 (3.9) |
| LIMA registry <sup>80</sup>         | 3579 (CHD + DM) | 67.6 (9.4)  | 63.5 | 2.6          | <1.8: 11.5; <2.5: 54.3 | 100  | 100  | NA   | NA   | 100  | 30.0 (4.7) |
| Margalhaes et al <sup>81</sup>      | 256             | 61.1 (10.6) | 76.2 | NA           | <2.6: 68               | NA   | NA   | 28.5 | 62.5 | 34.4 | 84.8% >30  |
| Palomaki et al <sup>82</sup>        | 219             | 66.5 (8.3)  | 79   | 2.07 (0.64)  | NA                     | 96.8 | NA   | NA   | NA   | 27   | 27.0 ± 4.1 |
| Pello et al <sup>83</sup>           | 684             | 61.4 (12.3) | 75.7 | 83.3 (25.8)  | NA                     | 87.4 | NA   | NA   | NA   |      | 28.7 (5.4) |
| Perez de Isla <sup>84</sup>         | 2586 (CAD)      | 64.2 (11.1) | 62.7 | 112.7 (36.0) | <1.8: 11.6; <2.6: 32.9 | 91.3 | NA   | 13.2 | 66.7 | 0    | 28.1 (4.0) |
| Perez de Isla <sup>84</sup>         | 1748 (CAD + DM) | 66.7 (10.1) | 62.7 | 107.2 (38.0) | <1.8: 18.9, <2.6: 40.9 | 90   | NA   | 9.3  | 81.9 | 100  | 30.0 (4.8) |
| PERIFERICA <sup>85</sup>            | 4087            | 68          | 74   | 119 (36)     | <2.6: 30.4             | 76.2 | 79.1 | 25.5 | 89.5 | 50.5 | 28.8 (4.4) |
| Perrone-Filardi et al <sup>86</sup> | 913             | 65          | 78   |              | <2.6: 57; <1.8: 20     | 91   | NA   | 13   | 21   | 26   | 20% >30    |
| Pillois et al <sup>87</sup>         | 240             | 53.1 (10.8) | 87   | 2.59 (0.85)  | <2.6: 73.8             | 100  | 100  | 65   | 30   | NA   | 27.4 (4.4) |
| PRIMULA <sup>88</sup>               | 3392            | NA          | NA   | NA           | <2.0: 41.9             | NA   | 100  | NA   | NA   | NA   | NA         |
| Rallidis et al <sup>89</sup>        | 1337            | 61.2 (9.5)  | 85.7 | NA           | <2.6: 50.6             | 82.6 | 86.5 | 30.6 | 65.2 | 33.3 | 28.8 (4.5) |
| Reiner et al <sup>90</sup>          | 1811            | 63.1        | 55.4 | NA           | <2.5: 35.5             | 100  | 100  | NA   | NA   | 42.1 | NA         |
| REPAR study <sup>91</sup>           | 1055            | 67 (10)     | 81.4 | 94 (44)      | <1.8: 26               | 91.0 | 95.3 | 15.5 | NA   | 34.7 | NA         |
| Rizza et al <sup>92</sup>           | 421             | 66 (9)      | 79   | 116 (34)     | NA                     | NA   | NA   | 74   | NA   | 19.5 | 27 (4)     |



|                                         |       |                 |      |                 |                           |      |      |      |      |      |                     |
|-----------------------------------------|-------|-----------------|------|-----------------|---------------------------|------|------|------|------|------|---------------------|
| Schnoell et al <sup>93</sup>            | 1195  | 64.6<br>(9.8)   | 74   | 85 (69-101)     | NA                        | NA   | NA   | 3.6  | NA   | 18.3 | NA                  |
| SMART <sup>94</sup>                     | 7216  | 60.1<br>(10.3)  | 74   | 2.87<br>(1.04)  | NA                        | 66   |      | 32   | 86   | 17   | 26.8 (4.0)          |
| SWEDEHEART <sup>95</sup>                | 17236 | 61.9<br>(8.5)   | 73.9 | 2.3 (0.8)       | <2.5: 72.3                | NA   | 92.9 | 31.6 | 40.4 | 19.7 | 27.4 (4.3)          |
| Target study <sup>96</sup>              | 366   | 63.9<br>(12.9)  | 78   | 97.8<br>(33.8)  | <2.6: 57.4; <1.8:<br>18.2 | 87.7 | NA   | NA   | NA   | NA   | NA                  |
| Toste et al <sup>97</sup>               | 253   | 61.6<br>(9.1)   | 75.5 | 109.4<br>(34.6) | NA                        | NA   | NA   | 21.7 | 70.4 | 100  | 204<br>(80.6)       |
| Toste et al <sup>97</sup>               | 429   | 58.6<br>(11.0)  | 78.8 | 110.5<br>(32.8) | NA                        | NA   | NA   | 37.1 | 52.4 | 0    | 258<br>(60.1)       |
| TROL registry<br>(2003-2010)            | 92071 | 63.4<br>(11.6)  | 72.4 | 116.2<br>(37.7) | <2.6: 71.9                | 90.1 | NA   | 16.3 | 83.9 | 32.2 | 28.1 (4.6)          |
| TROL registry<br>(2010)                 | 7950  | 62.1<br>(12.0)  | 75.6 | 86 (26)         | <2.6: 75.7                | 90.6 | NA   | 19.8 | 84.3 | 30.3 | 28.4 (4.9)          |
| Tunon et al <sup>98</sup>               | 628   | 59.0<br>(51-71) | 77   | 82.7<br>(24.2)  | NA                        | 89   | NA   | 6.7  | 62   | 22   | 28.4<br>(25.8-30.8) |
| Van Lieshout et al <sup>99</sup>        | 2960  | 68.7            | 67   | NA              | <2.5: 47.5                | 82.7 | NA   | NA   | NA   | NA   | NA                  |
| Vonbank et al <sup>100</sup>            | 850   | 66.5<br>(10.5)  | 66.5 | 123 (40)        | <1.8: 9.5; <2.6:<br>48.5  | 39.1 | NA   | 57.2 | 73.9 | 26.9 | 27.8 (4.6)          |
| <b>DM &amp; target organ<br/>damage</b> |       |                 |      |                 |                           |      |      |      |      |      |                     |
| ADAN study <sup>101</sup>               | 1462  | 78.1<br>(5.6)   | 59.1 | 112.0<br>(39.9) | <2.6: 35.8                | 96.4 | NA   | 14.4 | 80.4 | 100  | NA                  |
| Ciardullo et al <sup>102</sup>          | 4781  | 73.4<br>(11.5)  | 51   | 126.5<br>(35.6) | <2.6: 5.8                 | 15.1 | NA   | 12.1 | NA   | 100  | 28.9 (5.2)          |

|                                           |                           |                         |      |                         |            |      |    |      |      |     |                       |
|-------------------------------------------|---------------------------|-------------------------|------|-------------------------|------------|------|----|------|------|-----|-----------------------|
| GERODIAB <sup>103</sup>                   | 987                       | 77.1<br>(5.0)           | 47.9 | 97 (36)                 | <4.1: 95.2 | 62.9 | NA | NA   | 89.8 | 100 | 29.7 (5.2)            |
| MADIABETES<br>cohort study <sup>104</sup> | 965                       | 75.7<br>(8.2)           | 38.7 | 112.3<br>(30.3)         | NA         | 72.7 | NA | 9    | 86.6 | 100 | 30.1 (0.5)            |
| PRESCAP –<br>diabetes <sup>105</sup>      | 1742 (bad<br>BP control)  | 68.6<br>(10.0)          | 48.6 | 121.8<br>(36)           | NA         | NA   | NA | 16.9 | 100  | 100 | 53%                   |
| PRESCAP –<br>diabetes <sup>105</sup>      | 2251 (good<br>BP control) | 68 (10)                 | 50.9 | 112 (32)                | NA         | NA   | NA | 12.5 | 100  | 100 | 47.60%                |
| PRESDIAB <sup>106</sup>                   | 526                       | 66.2<br>(10.6)          | 61.3 | 110.1<br>(37.7)         | NA         | 60   | NA | 12.8 | 100  | 100 | 29.7 (5.0)            |
| STONE study <sup>107</sup>                | 625                       | 66.6<br>(65.7-<br>67.4) | 53.4 | 2.28<br>(2.22-<br>2.35) | NA         | NA   | NA | 10.6 | 82.7 | 100 | 32.8 (95<br>CI 32-33) |
| <b>FH</b>                                 |                           |                         |      |                         |            |      |    |      |      |     |                       |
| Beliard et al <sup>108</sup>              | 733                       | NA                      | NA   | 165 (60)                | <2.6: 9    | 79.3 | 84 | NA   | NA   | NA  | NA                    |
| Besseling et al <sup>109</sup>            | 25137                     | 38<br>(20.6)            | 47.4 | 204 (76)                | NA         | 28.9 | NA | 19.8 | NA   | 1.8 | 23.5 (5.4)            |
| Clarke et al <sup>110</sup>               | 204                       | 55 (14)                 | 47   | 6.20<br>(2.24)          | NA         | NA   | NA | 13   | 21   | 1   | NA                    |
| EDICONDIS-<br>ULISEA <sup>111</sup>       | Spain                     | 46.0<br>(13.1)          | 46.9 | 133 (40)                | <2.6: 15.8 | 94.6 | NA | 28.3 | 18.3 | 7.1 | NA                    |
| Galema-Boers <sup>112</sup>               | 321                       | 45.6<br>(13.9)          | 47.4 | 3.4 (1.1)               | <2.5: 18.7 | 97.8 | NA | 15.6 | 15.6 | 3.1 | 26.1 (4.4)            |
| Huijgen et al <sup>113</sup>              | 781                       | 42 (12)                 | 46   | 3.2 (1.1)               | <2.5: 22   | NA   | 81 | 42.1 | 9.8  | 2.5 | NA                    |
| Huijgen et al <sup>114</sup>              | 9169                      | 39 (22-<br>55)          | 48   | 4.46<br>(4.44-<br>4.50) | NA         | NA   | NA | NA   | NA   | NA  | NA                    |
| Jaruata et al <sup>115</sup>              | 279                       | 47.6<br>(12.1)          | 42.7 | 216                     | NA         | 65   | NA | 19.1 | 22.6 | 2.2 | 25.4 (4.2)            |

|                              |                               |                       |      |                            |                          |     |      |      |      |      |                         |
|------------------------------|-------------------------------|-----------------------|------|----------------------------|--------------------------|-----|------|------|------|------|-------------------------|
| Pijlman et al <sup>116</sup> | 1249                          | 49                    | 47   | 3.2 (1.1)                  | <2.5: 21                 | 96  | NA   | NA   | 20   | 2    | NA                      |
| SAFEHEART <sup>117</sup>     | 2752                          | 44<br>(34.0-<br>57.0) | 45.9 | 165.0<br>(138.6-<br>207.8) | <2.6: 11.2               | NA  | 80.5 | 26.4 | 14.4 | 3.2  | 25.9<br>(23.0-<br>29.1) |
| Talmud et al <sup>118</sup>  | 321 (no<br>known<br>mutation) | 54.9<br>(13.9)        | 46.8 | 4.22<br>(1.58)             | NA                       | NA  | NA   | NA   | NA   | NA   | NA                      |
| Talmud et al <sup>118</sup>  | 319<br>(known<br>mutation)    | 49.5<br>(14.0)        | 53.2 | 5.49<br>(1.34)             | NA                       | NA  | NA   | NA   | NA   | NA   | NA                      |
| <b>SCORE ≥5%</b>             |                               |                       |      |                            |                          |     |      |      |      |      |                         |
| ACT II <sup>47</sup>         | 1682                          | 64 (10)               | NA   | 95 (26)                    | <1.8:13.5; <2.6:<br>60.8 | 96  | NA   | NA   | NA   | NA   | NA                      |
| Barkas et al <sup>48</sup>   | 408 high<br>risk              | 63 (13)               | 45   | 109 (33)                   | <2.6: 42                 | 88  | NA   | 15   | 73   | 21   | 28.6 (4.3)              |
| Barkas et al <sup>48</sup>   | 477 v high<br>risk            | 63 (13)               | 45   | 90 (30)                    | <1.8: 25                 | 94  | NA   | 15   | 73   | 21   | 28.6 (4.3)              |
| Brotans et al <sup>119</sup> | 3409 high<br>risk             | NA                    | NA   | NA                         | <2.6: 18.7               | NA  | 23.6 | NA   | NA   | NA   | NA                      |
| Brotans et al <sup>119</sup> | 747 v high<br>risk            | NA                    | NA   | NA                         | <1.8: 3.1                | NA  | 31.8 | NA   | NA   | NA   | NA                      |
| CHALLENGE <sup>50</sup>      | 500                           | 62<br>(11.7)          | 55   | 140.9<br>(44.1)            | <2.6: 23.3               | NA  | 92.0 | 25.6 | NA   | 35.6 | 28.6<br>(4.41)          |
| DYSIS <sup>120</sup>         | 22063                         | 65.7<br>(9.9)         | 58.2 | 2.7 (1.0)                  | <2.5: 48.5               | 100 | 100  | 15.1 | 74.8 | 39.1 | 28.8 (5.2)              |
| FOCUS <sup>121</sup>         | 506                           | 66.3<br>(9.4)         | 57.9 | 2.45 (0.9)                 | <2.6: 63.1               | 100 | 100  | 14.8 | 75.5 | 54.3 | 28.5<br>(4.96)          |

|                                 |       |               |      |                 |                                                                     |      |    |      |      |      |                 |
|---------------------------------|-------|---------------|------|-----------------|---------------------------------------------------------------------|------|----|------|------|------|-----------------|
| Garcia Gil et al <sup>121</sup> | 21636 | 63.3<br>(6.3) | 81.6 | 3.06<br>(1.11)  | <3.4: 63.7; <2.6:<br>5.1                                            | 100  | NA | 52.2 | 68.3 | 56.0 | 29.92<br>(4.85) |
| Gibson et al <sup>122</sup>     | 375   | 57.5          | 49.4 | 2.53<br>(0.74)  | <2.5: 49                                                            | 65.1 | NA | NA   | NA   | 18.9 | 32.0 (6.2)      |
| Haberka et al <sup>123</sup>    | 420   | 61.2<br>(7.0) | 66   | 101.2<br>(41.3) | 38% of obese met<br>targets (depend on<br>HR/VHR), 30% non<br>obese | 100  | NA | NA   | 81   | 32   | 30.8 (5.9)      |

CVD, cardiovascular disease; LDL-C, low-density lipoprotein cholesterol; BMI, body mass index; DM, diabetes mellitus; FH, familial hypercholesterolaemia; NA, not applicable; SCORE, systematic coronary risk evaluation

### Appendix 3. Study characteristics

| Study name                                        | Country         | Type of study   | EAS/ESC risk group reported                            | Sample size | Year(s) of LDL-C measurement |
|---------------------------------------------------|-----------------|-----------------|--------------------------------------------------------|-------------|------------------------------|
| <b>Clinical CVD</b>                               |                 |                 |                                                        |             |                              |
| 2L cardio registry <sup>51</sup>                  | Germany         | Registry        | Clinical CVD (CAD)                                     | 6711        | May – December 2006          |
| ADRIE study <sup>52</sup>                         | Switzerland     | Cohort          | Clinical CVD (ASCVD)                                   | 771         | June 2006-December 2008      |
| ARTEMIS <sup>53</sup>                             | Finland         | Cohort          | Clinical CVD (CAD)                                     | 1490        | 2011-2013                    |
| ASPIRE-S <sup>54</sup>                            | Ireland         | Cohort          | Clinical CVD (ischaemic stroke)                        | 302         | October 2011-October 2012    |
| ATHEROREMO-IVUS <sup>55</sup>                     | Netherlands     | Cross-sectional | Clinical CVD (CAD)                                     | 581         | 2008-2011                    |
| Back et al <sup>56</sup>                          | Sweden          | Cohort          | Clinical CVD (CAD)                                     | 332         | 2007-2010                    |
| Brath et al <sup>57</sup>                         | Austria         | Cohort          | Clinical CVD (DM + CAD / PAD/ cerebrovascular disease) | 921         | 2007                         |
| CEPHEUS study <sup>58</sup>                       | 8 EU countries  | Cross-sectional | Clinical CVD or FH                                     | 4167 & 355  | April 2006-January 2007      |
| CIBAR study <sup>59</sup>                         | Spain           | Cohort          | Clinical CVD (CAD)                                     | 1848        | Feb-07                       |
| Citarella et al <sup>60</sup>                     | Sweden          | Cohort          | Clinical CVD (previous CV event)                       | 10417       | July 2006-June 2007          |
| CLARIFY <sup>61</sup>                             | 21 EU countries | Registry        | Clinical CVD (CAD)                                     | 12294       | November 2009-July 2010      |
| Co-Laus study <sup>62</sup>                       | Switzerland     | Cohort study    | Clinical CVD                                           | 303         | 2009-2012                    |
| Copenhagen General Population Study <sup>63</sup> | Denmark         | Cross-sectional | Clinical CVD (MI)                                      | 1521        | 2004-2010                    |
| Cordero et al <sup>64</sup>                       | Spain           | Registry        | Clinical CVD (stable IHD)                              | 1583 & 1110 | 2006 & 2014                  |
| Do Rego et al <sup>65</sup>                       | Spain           | Cross-sectional | Clinical CVD (CAD)                                     | 2586        | June-November 2006           |

|                                             |                 |                 |                                                  |             |                             |
|---------------------------------------------|-----------------|-----------------|--------------------------------------------------|-------------|-----------------------------|
| EDICONDIS-ULISEA                            | Spain           | Cohort          | Clinical CVD (ASCVD)                             | 329         | December 2011-February 2012 |
| ELDERCIC study <sup>66</sup>                | Spain           | Cross-sectional | Clinical CVD (CHD)                               | 1038        | Nov-08                      |
| EUROASPIRE III <sup>67</sup>                | 22 EU countries | Cross-sectional | Clinical CVD (CHD)                               | 13935       | 2006-2007                   |
| EUROASPIRE IV <sup>16</sup>                 | 24 EU countries | Cross-sectional | Clinical CVD (CHD)                               | 6648        | May 2012- April 2013        |
| Ferreras Amez et al <sup>68</sup>           | Spain           | Cross-sectional | Clinical CVD (PAD)                               | 4087        | May-December 2009           |
| Frigola-Capell et al <sup>69</sup>          | Spain           | Cohort study    | Clinical CVD (CHD)                               | 722         | 2008-2009                   |
| Garzon et al <sup>70</sup>                  | Spain           | Cross-sectional | Clinical CVD (T2DM and CVD)                      | 9647        | 2013                        |
| Gencer et al <sup>71</sup>                  | Switzerland     | Cohort study    | Clinical CVD (ACS)                               | 1602        | 2009-2012                   |
| Gitt et al <sup>72</sup>                    | Germany         | Cohort          | Clinical CVD                                     | 3273        | September 2007- March 2009  |
| Homburg Cream and Sugar Study <sup>73</sup> | Germany         | Cohort          | Clinical CVD (CAD + DM)                          | 504         | February 2008- March 2009   |
| ICP Bypass Study <sup>74</sup>              | Spain           | Cross-sectional | Clinical CVD (DM + coronary revascularisation)   | 771         | 2009                        |
| Jameson et al <sup>75</sup>                 | UK              | Cohort          | Clinical CVD (CHD or ASCVD)                      | 2241        | November 2008-November 2011 |
| Jankowski et al <sup>76</sup>               | Poland          | Cohort          | Clinical CVD (CAD)                               | 640 & 466   | 2005-2006 & 2010-2011       |
| Laforest et al <sup>77</sup>                | France          | Cross-sectional | Clinical CVD (ASCVD or DM + target organ damage) | 1201        | December 2007-May 2008      |
| Libungan et al <sup>78</sup>                | Sweden          | Cross-sectional | Clinical CVD (CAD)                               | 402         | October 2007- October 2009  |
| LifeLines Cohort study <sup>79</sup>        | Netherlands     | Cohort          | Clinical CVD (CAD, stroke, PAD)                  | 1302        | 2006-2012                   |
| LIMA registry <sup>80</sup>                 | Germany         | Registry        | Clinical CVD (CHD or PAD ± DM)                   | 4884 & 3579 | September 2007- March 2009  |
| Magalhaes et al <sup>81</sup>               | Portugal        | Cohort          | Clinical CVD (CAD)                               | 256         | January 2008- December 2009 |

|                                     |             |                 |                                                             |             |                              |
|-------------------------------------|-------------|-----------------|-------------------------------------------------------------|-------------|------------------------------|
| Palomaki et al <sup>82</sup>        | Finland     | Cohort study    | Clinical CVD (post op CABG)                                 | 219         | 2005-2009                    |
| Pello et al <sup>83</sup>           | Spain       | Cross-sectional | Clinical CVD (CHD)                                          | 684         | January 2007-February 2011   |
| Perez de Isla et al <sup>84</sup>   | Spain       | Cohort          | Clinical CVD (CAD with and without DM)                      | 2686 & 1748 | July-November 2006           |
| PERIFERICA <sup>85</sup>            | Spain       | Cross-sectional | Clinical CVD (PAD)                                          | 4087        | May-December 2009            |
| Perrone-Filardi et al <sup>86</sup> | Italy       | Cross-sectional | Clinical CVD (CAD)                                          | 913         | November 2006-February 2008  |
| Pillois et al <sup>87</sup>         | France      | Cohort          | Clinical CVD (CAD)                                          | 240         | September 2006- January 2008 |
| PRIMULA <sup>88</sup>               | UK          | Cross-sectional | Clinical CVD (CHD, cerebrovascular disease or PAD)          | 3392        | April 2006-December 2008     |
| Rallidis et al <sup>89</sup>        | Greece      | Cohort          | Clinical CVD (CHD)                                          | 1337        | 2006-2010                    |
| Reiner et al <sup>90</sup>          | Croatia     | Cross-sectional | Clinical CVD (ASCVD, DM + target organ damage or SCORE >5%) | 1811        | January – September 2011     |
| REPAR study <sup>91</sup>           | Spain       | Cohort study    | Clinical CVD (stable CHD)                                   | 1055        | November 2013-July 2014      |
| Rizza et al <sup>92</sup>           | Italy       | Cohort          | Clinical CVD (prior MACE)                                   | 411         | 2005-2012                    |
| Schnoell et al <sup>93</sup>        | Germany     | Cohort          | Clinical CVD (CAD)                                          | 1195        | September 2008- August 2009  |
| SMART <sup>94</sup>                 | Netherlands | Cohort study    | Clinical CVD (ASCVD)                                        | 7216        | September 1996-March 2014    |
| SWEDEHEART <sup>95</sup>            | Sweden      | Registry        | Clinical CVD (MI)                                           | 17236       | January 2006-June 2009       |
| TARGET study <sup>96</sup>          | Greece      | Cohort          | Clinical CVD (ACS)                                          | 366         | January-June 2010            |
| Toste et al <sup>97</sup>           | Portugal    | Cohort study    | Clinical CVD                                                | 253 & 429   | January 2009-June 2013       |
| TROL registry <sup>124</sup>        | Germany     | Registry        | Clinical CVD (ACS)                                          | 7950        | 2010                         |
| TROL registry <sup>125</sup>        | Germany     | Registry        | Clinical CVD (ACS)                                          | 92071       | 2003-2010                    |

|                                        |                |                 |                                                                     |             |                             |
|----------------------------------------|----------------|-----------------|---------------------------------------------------------------------|-------------|-----------------------------|
| Tunon et al <sup>98</sup>              | Spain          | Cohort          | Clinical CVD (CAD)                                                  | 628         | January 2007-February 2011  |
| Van Lieshout et al <sup>99</sup>       | 8 EU countries | Cohort          | Clinical CVD (CHD)                                                  | 2960        | 2008-2009                   |
| Vonbank et al <sup>100</sup>           | Austria        | Cohort          | Clinical CVD (CAD)                                                  | 850         | August 2005-February 2007   |
| <b>DM &amp; target organ damage</b>    |                |                 |                                                                     |             |                             |
| ADAN study <sup>101</sup>              | Spain          | Cross-sectional | DM + target organ damage (DM + hypertension)                        | 1462        | June-October 2009           |
| Ciardullo et al <sup>102</sup>         | Italy          | Cross-sectional | DM +target organ damage (microvascular disease)                     | 4781        | 2006-2007                   |
| GERODIAB <sup>103</sup>                | France         | Cohort          | DM + target organ damage (DM + hypertension)                        | 987         | June 2009-July 2010         |
| MADIABETES cohort study <sup>104</sup> | Spain          | Cohort          | DM + target organ damage (DM + CKD)                                 | 965         | 2007-2012                   |
| PRESCAP-Diabetes <sup>105</sup>        | Spain          | Cohort          | DM + target organ damage (DM + hypertension- poor and good control) | 1742 & 2251 | Jun-10                      |
| PRESDIAB <sup>106</sup>                | Spain          | Cross-sectional | DM + target organ damage (DM + hypertension)                        | 526         | April-July 2008             |
| STONE study <sup>107</sup>             | Finland        | Cohort          | DM + target organ damage (DM + hypertension)                        | 629         | March 2011- August 2012     |
| <b>FH</b>                              |                |                 |                                                                     |             |                             |
| Beliard et al <sup>108</sup>           | France         | Cross-sectional | Heterozygous FH                                                     | 733         | 2005-2014                   |
| Besseling et al <sup>109</sup>         | Netherlands    | Cohort study    | FH (genetic diagnosis)                                              | 25137       | 1994-2014                   |
| Clarke et al <sup>110</sup>            | UK             | Cohort          | FH                                                                  | 204         | 2005-2011                   |
| EDICONDIS-ULISEA <sup>111</sup>        | Spain          | Cohort          | Heterozygous FH                                                     | 241         | June-October 2010           |
| Galema-Boers et al <sup>112</sup>      | Netherlands    | Cross-sectional | Heterozygous FH                                                     | 321         | January 2008-December 2009  |
| Huijgen et al <sup>113</sup>           | Netherlands    | Cross-sectional | FH (with known mutation)                                            | 9169        | 2003-2010                   |
| Huijgen et al <sup>114</sup>           | Netherlands    | Cross-sectional | FH (molecular diagnosis)                                            | 781         | 2008                        |
| Jarauta et al <sup>115</sup>           | Netherlands    | Cohort          | FH                                                                  | 279         | January 2007-September 2012 |



|                                    |                       |                 |                                      |           |                            |
|------------------------------------|-----------------------|-----------------|--------------------------------------|-----------|----------------------------|
| Pijlman <sup>116</sup>             | Netherlands           | Cross-sectional | FH                                   | 1249      | February 2006-2008         |
| SAFEHEART <sup>117</sup>           | Spain                 | Registry        | Heterozygous FH                      | 2752      | January 2004-November 2013 |
| Talmud et al <sup>118</sup>        | UK                    | Cross-sectional | FH (with and without known mutation) | 319 & 321 | Nov-11                     |
| <b>SCORE <math>\geq 5\%</math></b> |                       |                 |                                      |           |                            |
| ACT II study <sup>47</sup>         | Austria               | Cohort          | SCORE $\geq 5\%$                     | 1682      | 2009-2010                  |
| Barkas et al <sup>48</sup>         | Greece                | Cohort          | SCORE $\geq 5\%$                     | 408 & 477 | 1999-2013                  |
| Brotons et al <sup>119</sup>       | Spain                 | Cross-sectional | SCORE $\geq 5\%$                     | 4156      | January-December 2011      |
| DYSIS study <sup>50</sup>          | 11 European countries | Cross-sectional | SCORE $\geq 5\%$                     | 22063     | April 2008-February 2009   |
| FOCUS study <sup>120</sup>         | Switzerland           | Cross-sectional | SCORE $\geq 5\%$                     | 506       | July 2008-June 2009        |
| Garcia-Gil et al <sup>121</sup>    | Spain                 | Cohort          | SCORE $\geq 5\%$                     | 21636     | July 2006-December 2010    |
| Gibson et al <sup>122</sup>        | Ireland               | Cohort          | SCORE $\geq 5\%$                     | 375       | 2009-2012                  |
| Haberka et al <sup>123</sup>       | Poland                | Cohort          | SCORE $\geq 5\%$                     | 420       | 2011-NS                    |
| CHALLENGE <sup>49</sup>            | Greece                | Cross-sectional | SCORE $\geq 5\%$                     | 500       | December 2012-April 2013   |

ACS, acute coronary syndrome; ASCVD, atherosclerotic cardiovascular disease; CABG, coronary artery bypass graft; CAD, coronary artery disease; CHD, coronary heart disease; CVD, cardiovascular disease; LDL-C, low-density lipoprotein cholesterol; BMI, body mass index; DM, diabetes mellitus; EAS, European Atherosclerosis Society; EU, Europe; ESC, European Society of Cardiology; FH, familial hypercholesterolaemia; IHD, ischaemic heart disease; LDL-C, low density lipoprotein cholesterol; MACE, major adverse cardiovascular events; MI, myocardial infarction; NS, not stated; PAD, peripheral artery disease; SCORE, systematic coronary risk evaluation; T2DM, type 2 diabetes.

#### Appendix 4. Method of FH diagnosis among included studies

| FH                 | Country     | Type of study   | Method of FH diagnosis                                                                                                                                                                                                                                                                                              |
|--------------------|-------------|-----------------|---------------------------------------------------------------------------------------------------------------------------------------------------------------------------------------------------------------------------------------------------------------------------------------------------------------------|
| Beliard et al      | France      | Cross-sectional | Heterozygous FH: known mutation in LDL-R, ApoB or the PCSK9 gene. If no mutation then clinically diagnosed using Simon Broome or Dutch lipid criteria.                                                                                                                                                              |
| Besseling et al    | Netherlands | Cohort study    | Heterozygous FH: genetic diagnosis with deleterious mutations only.                                                                                                                                                                                                                                                 |
| Clarke et al       | UK          | Cohort          | FH: Simon Broome criteria                                                                                                                                                                                                                                                                                           |
| EDICONDIS-ULISEA   | Spain       | Cohort          | Heterozygous FH: genetic diagnosis only                                                                                                                                                                                                                                                                             |
| Galema-Boers et al | Netherlands | Cross-sectional | Heterozygous FH: mutation in LDL-R/ ApoB or Aalst Cohen criteria.                                                                                                                                                                                                                                                   |
| Huijgen et al      | Netherlands | Cross-sectional | Heterozygous FH: mutation in LDL-R/ ApoB                                                                                                                                                                                                                                                                            |
| Huijgen et al      | Netherlands | Cross-sectional | Heterozygous FH: mutation in LDL-R/ ApoB                                                                                                                                                                                                                                                                            |
| Jarauta et al      | Netherlands | Cohort          | Heterozygous FH: off-treatment LDL cholesterol higher than the age- and sex-specific 95th percentile of a Spanish reference population, triglycerides <200 mg/dL, and familial vertical transmission with at least 1 first-degree relative with LDL cholesterol higher than age- and sex specific 95th percentiles. |
| Pijlman            | Netherlands | Cross-sectional | Heterozygous FH: mutation in LDL-R/ ApoB or WHO criteria.                                                                                                                                                                                                                                                           |
| SAFEHEART          | Spain       | Registry        | Heterozygous FH: mutation in LDL-R                                                                                                                                                                                                                                                                                  |
| Talmud et al       | UK          | Cross-sectional | FH: mutation in LDL-R, ApoB or the PCSK9 gene.                                                                                                                                                                                                                                                                      |

Apo-B, apolipoprotein B; FH, familial hypercholesterolaemia; LDL-R, low-density lipoprotein receptor; PCSK9, proprotein convertase subtilisin/kelvin type 9; UK, United Kingdom;

## Appendix 5. Risk of bias assessment

| Study name                          | Confounding | Selection | Measurement of intervention | Missing data | Measurement of outcomes | Reported result |
|-------------------------------------|-------------|-----------|-----------------------------|--------------|-------------------------|-----------------|
| <b>Clinical CVD</b>                 |             |           |                             |              |                         |                 |
| 2L cardio registry                  | Moderate    | Low       | Low                         | Low          | Low                     | Moderate        |
| ADRIE study                         | Moderate    | Low       | Low                         | Low          | Low                     | Moderate        |
| ARTEMIS                             | Moderate    | Low       | Low                         | Low          | Low                     | Moderate        |
| ASPIRE-S                            | Moderate    | Low       | Low                         | Low          | Low                     | Moderate        |
| ATHEROREMO-IVUS                     | Moderate    | Low       | Low                         | Low          | Low                     | Moderate        |
| Back et al                          | Moderate    | Low       | Low                         | Low          | Low                     | Moderate        |
| Brath et al                         | Moderate    | Low       | Low                         | Moderate     | Low                     | Moderate        |
| CEPHEUS study                       | Moderate    | Low       | Low                         | Moderate     | Low                     | Moderate        |
| CIBAR study                         | Moderate    | Low       | Low                         | Low          | Low                     | Moderate        |
| Citarella et al                     | Moderate    | Low       | Low                         | Low          | Low                     | Moderate        |
| CLARIFY                             | Moderate    | Low       | Low                         | Low          | Low                     | Moderate        |
| Co-Laus study                       | Moderate    | Low       | Low                         | Low          | Low                     | Moderate        |
| Copenhagen General Population Study | Moderate    | Low       | Low                         | Low          | Low                     | Moderate        |
| Cordero et al                       | Moderate    | Low       | Low                         | Low          | Low                     | Moderate        |
| Do Rego et al                       | Moderate    | Low       | Low                         | Low          | Low                     | Moderate        |
| EDICONDIS-ULISEA                    | Moderate    | Low       | Low                         | Moderate     | Low                     | Moderate        |
| ELDERCIC study                      | Moderate    | Low       | Low                         | Low          | Low                     | Moderate        |
| EUROASPIRE III                      | Moderate    | Low       | Low                         | Low          | Low                     | Moderate        |
| EUROASPIRE IV                       | Moderate    | Low       | Low                         | Low          | Low                     | Moderate        |
| Ferreras Amez et al                 | Moderate    | Low       | Low                         | Low          | Low                     | Moderate        |
| Frigola-Capell et al                | Moderate    | Low       | Low                         | Low          | Low                     | Moderate        |
| Garzon et al                        | Moderate    | Low       | Low                         | Low          | Low                     | Moderate        |
| Gencer et al                        | Moderate    | Low       | Low                         | Low          | Low                     | Moderate        |
| Git et al                           | Moderate    | Low       | Low                         | Low          | Low                     | Moderate        |
| Homburg Cream and Sugar Study       | Moderate    | Low       | Low                         | Low          | Low                     | Moderate        |
| ICP Bypass Study                    | Moderate    | Low       | Low                         | Low          | Low                     | Moderate        |
| Jameson et al                       | Moderate    | Low       | Low                         | Low          | Low                     | Moderate        |
| Jankowski et al                     | Moderate    | Low       | Low                         | Low          | Low                     | Moderate        |
| Laforest et al                      | Moderate    | Low       | Low                         | Low          | Low                     | Moderate        |
| Libungan et al                      | Moderate    | Low       | Low                         | Low          | Low                     | Moderate        |

|                                     |          |     |     |          |     |          |
|-------------------------------------|----------|-----|-----|----------|-----|----------|
| LifeLines Cohort study              | Moderate | Low | Low | Low      | Low | Moderate |
| LIMA registry                       | Moderate | Low | Low | Low      | Low | Moderate |
| Margalhaes et al                    | Moderate | Low | Low | Low      | Low | Moderate |
| Palomaki et al                      | Moderate | Low | Low | Low      | Low | Moderate |
| Pello et al                         | Moderate | Low | Low | Low      | Low | Moderate |
| Perez de Isla et al                 | Moderate | Low | Low | Low      | Low | Moderate |
| PERIFERICA                          | Moderate | Low | Low | Low      | Low | Moderate |
| Perrone-Filardi et al               | Moderate | Low | Low | Low      | Low | Moderate |
| Pillois et al                       | Moderate | Low | Low | Low      | Low | Moderate |
| PRIMULA                             | Moderate | Low | Low | Moderate | Low | Moderate |
| Rallidis et al                      | Moderate | Low | Low | Low      | Low | Moderate |
| Reiner et al                        | Moderate | Low | Low | Low      | Low | Moderate |
| REPAR study                         | Moderate | Low | Low | Low      | Low | Moderate |
| Rizza et al                         | Moderate | Low | Low | Low      | Low | Moderate |
| Schnoell et al                      | Moderate | Low | Low | Low      | Low | Moderate |
| SMART                               | Moderate | Low | Low | Low      | Low | Moderate |
| SWEDEHEART                          | Moderate | Low | Low | Low      | Low | Moderate |
| TARGET study                        | Moderate | Low | Low | Low      | Low | Moderate |
| Toste et al                         | Moderate | Low | Low | Low      | Low | Moderate |
| TROL registry                       | Moderate | Low | Low | Low      | Low | Moderate |
| TROL registry                       | Moderate | Low | Low | Low      | Low | Moderate |
| Tunon et al                         | Moderate | Low | Low | Low      | Low | Moderate |
| Van Lieshout et al                  | Moderate | Low | Low | Low      | Low | Moderate |
| Vonbank et al                       | Moderate | Low | Low | Low      | Low | Moderate |
| <b>DM &amp; target organ damage</b> |          |     |     |          |     |          |
| ADAN study                          | Moderate | Low | Low | Low      | Low | Moderate |
| Ciardullo et al                     | Moderate | Low | Low | Low      | Low | Moderate |
| GERODIAB                            | Moderate | Low | Low | Low      | Low | Moderate |
| MADIABETES cohort study             | Moderate | Low | Low | Low      | Low | Moderate |
| PRESCAP-Diabetes                    | Moderate | Low | Low | Low      | Low | Moderate |
| PRESIDIAB                           | Moderate | Low | Low | Low      | Low | Moderate |
| STONE study                         | Moderate | Low | Low | Low      | Low | Moderate |
| <b>FH</b>                           |          |     |     |          |     |          |
| Beliard et al                       | Moderate | Low | Low | Moderate | Low | Moderate |

|                                  |          |          |     |          |     |          |
|----------------------------------|----------|----------|-----|----------|-----|----------|
| Besseling et al                  | Moderate | Low      | Low | Low      | Low | Moderate |
| Clarke et al                     | Moderate | Low      | Low | Low      | Low | Moderate |
| EDICONDIS-ULISEA                 | Moderate | Low      | Low | Low      | Low | Moderate |
| Galema-Boers et al               | Moderate | Low      | Low | Low      | Low | Moderate |
| Huijgen et al                    | Moderate | Low      | Low | Low      | Low | Moderate |
| Huijgen et al                    | Moderate | Low      | Low | Low      | Low | Moderate |
| Jaruata et al                    | Moderate | Low      | Low | Low      | Low | Moderate |
| Pijlman                          | Moderate | Low      | Low | Low      | Low | Moderate |
| SAFEHEART                        | Moderate | Low      | Low | Low      | Low | Moderate |
| Talmud et al                     | Moderate | Low      | Low | Low      | Low | Moderate |
| <b>SCORE <math>\geq</math>5%</b> |          |          |     |          |     |          |
| ACT II study                     |          | Low      | Low | Low      | Low | Moderate |
| Barkas et al                     | Moderate | Low      | Low | Low      | Low | Moderate |
| Brotons et al                    | Moderate | Low      | Low | Moderate | Low | Moderate |
| DYSIS study                      | Moderate | Low      | Low | Low      | Low | Moderate |
| FOCUS study                      | Moderate | Low      | Low | Low      | Low | Moderate |
| Garcia-Gil et al                 | Moderate | Low      | Low | Low      | Low | Moderate |
| Gibson et al                     | Moderate | Low      | Low | Low      | Low | Moderate |
| Haberka et al                    | Moderate | Moderate | Low | Low      | Low | Moderate |
| CHALLENGE                        | Moderate | Low      | Low | Low      | Low | Moderate |

## Appendix 6. LDL-C goal attainment among patients with established CVD

A corresponds to achievement of LDL-C <1.8 mmol/L; B corresponds to achievement of LDL-C <2.5 mmol/L. The size of the bubble corresponds to the number of patients in each of the included studies

LDL-C, low-density lipoprotein cholesterol.

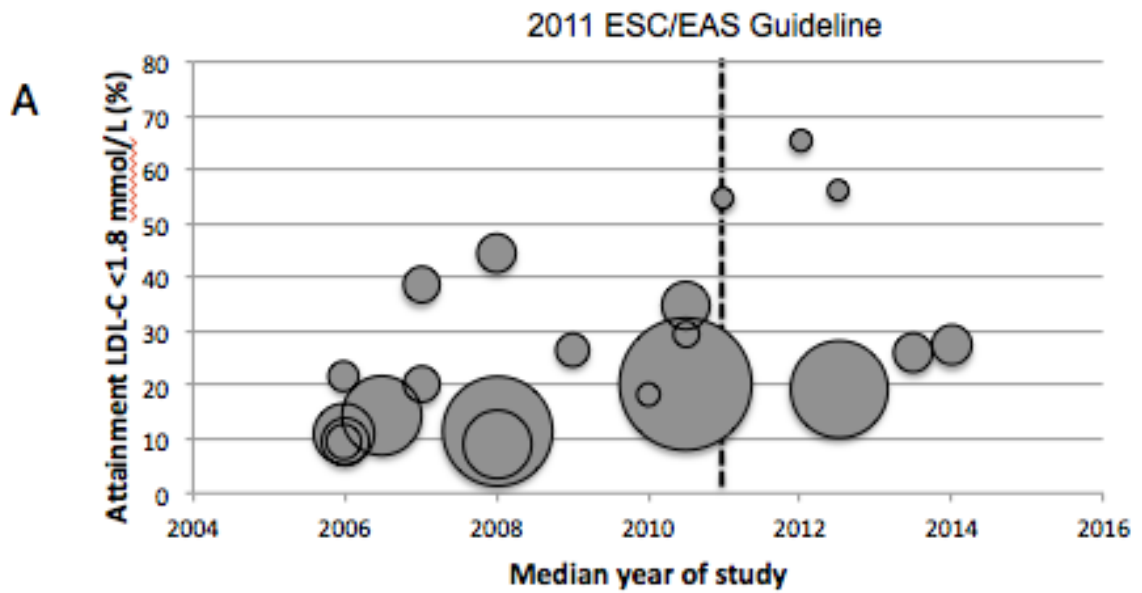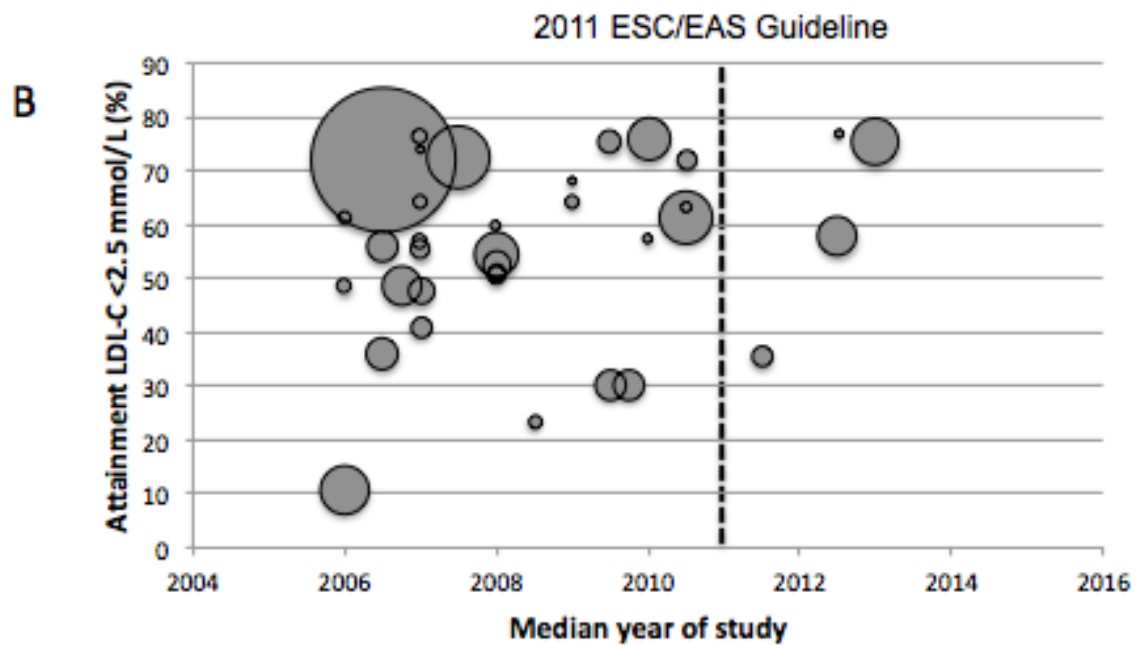

### Appendix 7. Event rates per 1000 person years

| Study name                    | Sample size, n | LDL-C, mmol/L | ACM, per 1000 PY | Stroke, per 1000 PY | MI, per 1000 PY | MACE, per 1000 PY |
|-------------------------------|----------------|---------------|------------------|---------------------|-----------------|-------------------|
| <b>Clinical CVD</b>           |                |               |                  |                     |                 |                   |
| ADRIE study                   | 771            |               |                  | 9.5                 | 13.8            | 51.9              |
| CIBAR                         | 1848           |               | 13.5             |                     |                 |                   |
| Homburg Cream and Sugar Study | 502            | 2.6 (2.1-3.3) |                  |                     |                 | 108.1             |
| LIMA registry (CHD + DM)      | 4884           | 2.7           | 7                | 5.9                 | 13              |                   |
| LIMA registry (CHD alone)     | 3579           | 2.6           | 3.1              | 3.1                 | 11              |                   |
| Pello et al                   | 684            | 2.2 (0.7)     | 15.3             | 4.9                 | 29.2            |                   |
| Rallidis et al                | 1337           |               |                  | 1.2                 | 32.4            | 76.6              |
| Rizza et al                   | 421            | 3.0 (0.9)     |                  |                     |                 | 10.7              |
| SMART                         | 7216           | 2.9 (1.04)    | 28.2             | 7                   | 9.3             | 25.3              |
| Target study                  | 366            | 2.5 (0.9)     | 58.5             |                     |                 | 167.5             |
| <b>FH</b>                     |                |               |                  |                     |                 |                   |
| SAFEHEART                     | 2752           | 4.3 (3.6-5.4) |                  |                     |                 | 9.4               |
| <b>DM</b>                     |                |               |                  |                     |                 |                   |
| MADIABETES                    | 965            | 2.9 (0.8)     | 51.5             |                     |                 |                   |

CVD, cardiovascular disease; LDL-C, low-density lipoprotein cholesterol; ACM, all-cause mortality; DM, diabetes mellitus; FH, familial hypercholesterolaemia; MI, myocardial infarction; MACE, major adverse cardiovascular event

## Appendix 8. List of included studies

1. Catapano AL, Graham I, De Backer G, Wiklund O, Chapman MJ, Drexel H, Hoes AW, Jennings CS, Landmesser U and Pedersen TR. 2016 ESC/EAS guidelines for the management of dyslipidaemias. *European heart journal*. 2016;37:2999-3058.
2. Trialists CT. Efficacy and safety of more intensive lowering of LDL cholesterol: a meta-analysis of data from 170 000 participants in 26 randomised trials. *The Lancet*. 2010;376:1670-1681.
3. Trialists CT. The effects of lowering LDL cholesterol with statin therapy in people at low risk of vascular disease: meta-analysis of individual data from 27 randomised trials. *The Lancet*. 2012;380:581-590.
4. Piepoli MF, Hoes AW, Agewall S, Albus C, Brotons C, Catapano AL, Cooney M-T, Corrà U, Cosyns B and Deaton C. 2016 European Guidelines on cardiovascular disease prevention in clinical practice: The Sixth Joint Task Force of the European Society of Cardiology and Other Societies on Cardiovascular Disease Prevention in Clinical Practice (constituted by representatives of 10 societies and by invited experts) Developed with the special contribution of the European Association for Cardiovascular Prevention & Rehabilitation (EACPR). *European heart journal*. 2016;37:2315-2381.
5. Reiner Ž, Catapano AL, De Backer G, Graham I, Taskinen M-R, Wiklund O, Agewall S, Alegria E, Chapman MJ and Durrington P. ESC/EAS Guidelines for the management of dyslipidaemias: the Task Force for the management of dyslipidaemias of the European Society of Cardiology (ESC) and the European Atherosclerosis Society (EAS). *European heart journal*. 2011;32:1769-1818.
6. Santos RD, Waters DD, Tarasenko L, Messig M, Jukema JW, Chiang C-W, Ferrieres J and Foody JM. A comparison of non-HDL and LDL cholesterol goal attainment in a large, multinational patient population: the Lipid Treatment Assessment Project 2. *Atherosclerosis*. 2012;224:150-153.
7. Conroy R, Pyörälä K, Fitzgerald Ae, Sans S, Menotti A, De Backer G, De Bacquer D, Ducimetiere P, Jousilahti P and Keil U. Estimation of ten-year risk of fatal cardiovascular disease in Europe: the SCORE project. *European heart journal*. 2003;24:987-1003.
8. Stroup DF, Berlin JA, Morton SC, Olkin I, Williamson GD, Rennie D, Moher D, Becker BJ, Sipe TA and Thacker SB. Meta-analysis of observational studies in epidemiology: a proposal for reporting. *Jama*. 2000;283:2008-2012.
9. Moher D, Liberati A, Tetzlaff J, Altman DG and Group P. Preferred reporting items for systematic reviews and meta-analyses: the PRISMA statement. *PLoS medicine*. 2009;6:e1000097.
10. Ravnskov U. Lack of evidence for recommended low-density lipoprotein cholesterol treatment targets. *Annals of internal medicine*. 2007;146:614; author reply 614.
11. De Vera MA, Bhole V, Burns LC and Lacaille D. Impact of statin adherence on cardiovascular disease and mortality outcomes: a systematic review. *British journal of clinical pharmacology*. 2014;78:684-698.
12. Sterne JA, Hernán MA, Reeves BC, Savović J, Berkman ND, Viswanathan M, Henry D, Altman DG, Ansari MT and Boutron I. ROBINS-I: a tool for assessing risk of bias in non-randomised studies of interventions. *Bmj*. 2016;355:i4919.
13. Mehta RH, Bhatt DL, Steg PG, Goto S, Hirsch AT, Liao C-S, Röther J, Wilson PW, Richard A-J and Eagle KA. Modifiable risk factors control and its relationship with 1 year outcomes after coronary artery bypass surgery: insights from the REACH registry. *European heart journal*. 2008;29:3052-3060.
14. Vedin O, Hagström E, Stewart R, Brown R, Krug-Gourley S, Davies R, Wallentin L, White H and Held C. Secondary prevention and risk factor target achievement in a global, high-risk population with



established coronary heart disease: baseline results from the STABILITY study. *European journal of preventive cardiology*. 2013;20:678-685.

15. Yusuf S, Islam S, Chow CK, Rangarajan S, Dagenais G, Diaz R, Gupta R, Kelishadi R, Iqbal R and Avezum A. Use of secondary prevention drugs for cardiovascular disease in the community in high-income, middle-income, and low-income countries (the PURE Study): a prospective epidemiological survey. *The Lancet*. 2011;378:1231-1243.
16. Kotseva K, Wood D, De Bacquer D, De Backer G, Rydén L, Jennings C, Gyberg V, Amouyel P, Bruthans J and Castro Conde A. EUROASPIRE IV: A European Society of Cardiology survey on the lifestyle, risk factor and therapeutic management of coronary patients from 24 European countries. *European journal of preventive cardiology*. 2016;23:636-648.
17. Maddox TM, Borden WB, Tang F, Virani SS, Oetgen WJ, Mullen JB, Chan PS, Casale PN, Douglas PS and Masoudi FA. Implications of the 2013 ACC/AHA cholesterol guidelines for adults in contemporary cardiovascular practice. *Journal of the American College of Cardiology*. 2014;64:2183-2192.
18. Shah NS, Huffman MD, Ning H and Lloyd-Jones DM. Trends in myocardial infarction secondary prevention: the National Health and Nutrition Examination Surveys (NHANES), 1999–2012. *Journal of the American Heart Association*. 2015;4:e001709.
19. Steen DL, Khan I, Ansell D, Sanchez RJ and Ray KK. Retrospective examination of lipid-lowering treatment patterns in a real-world high-risk cohort in the UK in 2014: comparison with the National Institute for Health and Care Excellence (NICE) 2014 lipid modification guidelines. *BMJ open*. 2017;7:e013255.
20. de la Sierra A, Pintó X, Guíjarro C, Miranda JL, Callejo D, Cuervo J, Subirà R and Rubio M. Prevalence, treatment, and control of hypercholesterolemia in high cardiovascular risk patients: evidences from a systematic literature review in Spain. *Advances in therapy*. 2015;32:944-961.
21. Toth PP, Foody JM, Tomassini JE, Sajjan SG, Ramey DR, Neff DR, Tershakovec AM, Hu XH and Tunceli K. Therapeutic practice patterns related to statin potency and ezetimibe/simvastatin combination therapies in lowering LDL-C in patients with high-risk cardiovascular disease. *Journal of clinical lipidology*. 2014;8:107-116.
22. Simpson RJ, Tunceli K, Ramey DR, Neff DR, Kern DM, Hsieh H-M, Wertz DA, Stephenson JJ, Marrett E and Tomassini JE. Treatment pattern changes in high-risk patients newly initiated on statin monotherapy in a managed care setting. *Journal of clinical lipidology*. 2013;7:399-407.
23. Arnold SV, Spertus JA, Masoudi FA, Daugherty SL, Maddox TM, Li Y, Dodson JA and Chan PS. Beyond medication prescription as performance measures: optimal secondary prevention medication dosing after acute myocardial infarction. *Journal of the American College of Cardiology*. 2013;62:1791-1801.
24. Arnold SV, Kosiborod M, Tang F, Zhao Z, Maddox TM, McCollam PL, Birt J and Spertus JA. Patterns of statin initiation, intensification, and maximization among patients hospitalized with an acute myocardial infarction. *Circulation*. 2014:CIRCULATIONAHA. 113.003589.
25. Javed U, Deedwania PC, Bhatt DL, Cannon CP, Dai D, Hernandez AF, Peterson ED and Fonarow GC. Use of intensive lipid-lowering therapy in patients hospitalized with acute coronary syndrome: An analysis of 65,396 hospitalizations from 344 hospitals participating in Get With The Guidelines (GWTG). *American heart journal*. 2011;161:418-424. e3.
26. Robinson JG, Farnier M, Krempf M, Bergeron J, Luc G, Averna M, Stroes ES, Langslet G, Raal FJ and El Shahawy M. Efficacy and safety of alirocumab in reducing lipids and cardiovascular events. *New England Journal of Medicine*. 2015;372:1489-1499.
27. Sabatine MS, Giugliano RP, Wiviott SD, Raal FJ, Blom DJ, Robinson J, Ballantyne CM, Somaratne R, Legg J and Wasserman SM. Efficacy and safety of evolocumab in reducing lipids and cardiovascular events. *New England Journal of Medicine*. 2015;372:1500-1509.

28. Cannon CP, Blazing MA, Giugliano RP, McCagg A, White JA, Theroux P, Darius H, Lewis BS, Ophuis TO and Jukema JW. Ezetimibe added to statin therapy after acute coronary syndromes. *New England Journal of Medicine*. 2015;372:2387-2397.
29. Sabatine MS, Giugliano RP, Keech AC, Honarpour N, Wiviott SD, Murphy SA, Kuder JF, Wang H, Liu T and Wasserman SM. Evolocumab and clinical outcomes in patients with cardiovascular disease. *N Engl J Med*. 2017;2017:1713-1722.
30. Group HTRC. Effects of anacetrapib in patients with atherosclerotic vascular disease. *New England Journal of Medicine*. 2017;377:1217-1227.
31. Ridker PM, Everett BM, Thuren T, MacFadyen JG, Chang WH, Ballantyne C, Fonseca F, Nicolau J, Koenig W and Anker SD. Antiinflammatory therapy with canakinumab for atherosclerotic disease. *New England Journal of Medicine*. 2017;377:1119-1131.
32. Law MR, Wald NJ and Rudnicka A. Quantifying effect of statins on low density lipoprotein cholesterol, ischaemic heart disease, and stroke: systematic review and meta-analysis. *Bmj*. 2003;326:1423.
33. Finegold JA, Manisty CH, Goldacre B, Barron AJ and Francis DP. What proportion of symptomatic side effects in patients taking statins are genuinely caused by the drug? Systematic review of randomized placebo-controlled trials to aid individual patient choice. *European journal of preventive cardiology*. 2014;21:464-474.
34. Robinson JG and Ray K. Counterpoint: low-density lipoprotein cholesterol targets are not needed in lipid treatment guidelines. *Arteriosclerosis, thrombosis, and vascular biology*. 2016;36:586-590.
35. Landmesser U, Chapman MJ, Stock JK, Amarenco P, Belch JJ, Borén J, Farnier M, Ference BA, Gielen S and Graham I. 2017 Update of ESC/EAS Task Force on practical clinical guidance for proprotein convertase subtilisin/kexin type 9 inhibition in patients with atherosclerotic cardiovascular disease or in familial hypercholesterolaemia. *European heart journal*. 2017.
36. Zamora A, Masana L, Comas-Cufi M, Plana N, Vila À, García-Gil M, Alves-Cabratos L, Elosua R, Marrugat J and Ramos R. Número de pacientes candidatos a recibir inhibidores de la PCSK9 según datos de 2, 5 millones de participantes de la práctica clínica real. *Revista Española de Cardiología*. 2017.
37. Ho PM, Magid DJ, Shetterly SM, Olson KL, Maddox TM, Peterson PN, Masoudi FA and Rumsfeld JS. Medication nonadherence is associated with a broad range of adverse outcomes in patients with coronary artery disease. *American heart journal*. 2008;155:772-779.
38. Yang Y, Thumula V, Pace PF, Banahan BF, Wilkin NE and Lobb WB. Predictors of medication nonadherence among patients with diabetes in Medicare Part D programs: a retrospective cohort study. *Clinical therapeutics*. 2009;31:2178-2188.
39. Foody JM, Joyce AT, Rudolph AE, Liu LZ and Benner JS. Persistence of atorvastatin and simvastatin among patients with and without prior cardiovascular diseases: a US managed care study. *Current medical research and opinion*. 2008;24:1987-2000.
40. Guglielmi V, Bellia A, Pecchioli S, Della-Morte D, Parretti D, Cricelli I, Medea G, Sbraccia P, Lauro D and Cricelli C. Effectiveness of adherence to lipid lowering therapy on LDL-cholesterol in patients with very high cardiovascular risk: A real-world evidence study in primary care. *Atherosclerosis*. 2017.
41. Puri R, Libby P, Nissen SE, Wolski K, Ballantyne CM, Barter PJ, Chapman MJ, Erbel R, Raichlen JS and Uno K. Long-term effects of maximally intensive statin therapy on changes in coronary atheroma composition: insights from SATURN. *European Heart Journal–Cardiovascular Imaging*. 2014;15:380-388.
42. Navarese EP, Kowalewski M, Andreotti F, van Wely M, Camaro C, Kolodziejczak M, Gorny B, Wirianta J, Kubica J and Kelm M. Meta-analysis of time-related benefits of statin therapy in patients with acute coronary syndrome undergoing percutaneous coronary intervention. *The American journal of cardiology*. 2014;113:1753-1764.

43. Nielsen SF and Nordestgaard BG. Negative statin-related news stories decrease statin persistence and increase myocardial infarction and cardiovascular mortality: a nationwide prospective cohort study. *European heart journal*. 2015;37:908-916.
44. Matthews A, Herrett E, Gasparrini A, Van Staa T, Goldacre B, Smeeth L and Bhaskaran K. Impact of statin related media coverage on use of statins: interrupted time series analysis with UK primary care data. *bmj*. 2016;353:i3283.
45. Zhang H, Plutzky J, Shubina M and Turchin A. Continued statin prescriptions after adverse reactions and patient outcomes: a cohort study. *Annals of Internal Medicine*. 2017;167:221-227.
46. Serban M-C, Colantonio LD, Manthripragada AD, Monda KL, Bittner VA, Banach M, Chen L, Huang L, Dent R and Kent ST. Statin intolerance and risk of coronary heart events and all-cause mortality following myocardial infarction. *Journal of the American College of Cardiology*. 2017;69:1386-1395.
47. Eber B, Lautsch D, Fauer C, Drexel H, Pfeiffer KP, Traindl O and Pichler M. Can LDL-cholesterol targets be achieved in a population at high risk? Results of the non-interventional study ACT II. *Current medical research and opinion*. 2012;28:1447-1454.
48. Barkas F, Milionis H, Kostapanos MS, Mikhailidis DP, Elisaf M and Liberopoulos E. How effective are the ESC/EAS and 2013 ACC/AHA guidelines in treating dyslipidemia? Lessons from a lipid clinic. *Current medical research and opinion*. 2015;31:221-228.
49. Alexopoulos D, Anastasiou-Nana M, Elisaf MS, Liberopoulos E, Rallidis LS, Davos CH, Moulis A, Nikas N, Zacharis E and Vardas P. A contemporary cross-sectional study on dyslipidemia management, cardiovascular risk status, and patients' quality of life in Greece: The CHALLENGE study. *International journal of cardiology*. 2016;217:183-189.
50. Gitt AK, Drexel H, Feely J, Ferrières J, Gonzalez-Juanatey JR, Thomsen KK, Leiter LA, Lundman P, da Silva PM and Pedersen T. Persistent lipid abnormalities in statin-treated patients and predictors of LDL-cholesterol goal achievement in clinical practice in Europe and Canada. *European journal of preventive cardiology*. 2012;19:221-230.
51. Gitt AK, Juenger C, Jannowitz C, Karmann B, Senges J and Bestehorn K. Guideline-oriented ambulatory lipid-lowering therapy of patients at high risk for cardiovascular events by cardiologists in clinical practice: the 2L cardio registry. *European Journal of Cardiovascular Prevention & Rehabilitation*. 2009;16:438-444.
52. Reny J-L, Berdagué P, Poncet A, Barazer I, Nolli S, Fabbro-Peray P, Schved J-F, Bounameaux H, Mach F and De Moerloose P. Antiplatelet drug response status does not predict recurrent ischemic events in stable cardiovascular patients: results of the ADRIE study. *Circulation*. 2012:CIRCULATIONAHA.111.085464.
53. Pekkanen M, Ukkola O, Hedberg P, Piira O, Lepojärvi S, Lumme J, Tulppo M and Huikuri H. Serum 25-hydroxyvitamin D is associated with major cardiovascular risk factors and cardiac structure and function in patients with coronary artery disease. *Nutrition, Metabolism and Cardiovascular Diseases*. 2015;25:471-478.
54. Brewer L, Mellon L, Hall P, Dolan E, Horgan F, Shelley E, Hickey A and Williams D. Secondary prevention after ischaemic stroke: the ASPIRE-S study. *BMC neurology*. 2015;15:216.
55. Cheng JM, Oemrawsingh RM, Garcia-Garcia HM, Boersma E, van Geuns R-J, Serruys PW, Kardys I and Akkerhuis KM. PCSK9 in relation to coronary plaque inflammation: results of the ATHEROREMO-IVUS study. *Atherosclerosis*. 2016;248:117-122.
56. Bäck M, Cider Å, Gillström J and Herlitz J. Physical activity in relation to cardiac risk markers in secondary prevention of coronary artery disease. *International journal of cardiology*. 2013;168:478-483.
57. Brath H, Wascher T, Kästenbauer T and Toplak H. Screening for hyperlipidemia in cardiovascular high-risk patients in austrian diabetes ambulances. *MMW Fortschritte der Medizin*. 2012;154:41-47.

58. Hermans MP, Castro Cabezas M, Strandberg T, Ferrières J, Feely J, Elisaf M, Michel G and Sansoy V. Centralized Pan-European survey on the under-treatment of hypercholesterolaemia (CEPHEUS): overall findings from eight countries. *Current medical research and opinion*. 2010;26:445-454.
59. Raviña FO, Mazón-Ramos P, Grigorian-Shamagian L, Nores-Lorenzo A, Zugaza-Gurruchaga L, Seoane-Blanco R, Molina-Blanco A and González-Juanatey JR. Effect of diabetes on the clinical characteristics and prognosis of patients with chronic ischemic heart disease. The CIBAR study. *Revista Española de Cardiología (English Edition)*. 2010;63:1371-1376.
60. Citarella A, Linder M, Kieler H, Berglind IA, Sundström A, Wettermark B and Andersen M. Influence of baseline low-density lipoprotein cholesterol values on statin therapy persistence. *European journal of clinical pharmacology*. 2016;72:349-357.
61. Ferrari R, Ford I, Greenlaw N, Tardif J-C, Tendera M, Abergel H, Fox K, Hu D, Shalnova S and Steg PG. Geographical variations in the prevalence and management of cardiovascular risk factors in outpatients with CAD: Data from the contemporary CLARIFY registry. *European journal of preventive cardiology*. 2015;22:1056-1065.
62. Antiochos P, Marques-Vidal P, Waeber G and Vollenweider P. Five year trends in dyslipidaemia prevalence and management in Switzerland: the CoLaus study. *Nutrition, Metabolism and Cardiovascular Diseases*. 2015;25:1007-1015.
63. Siggaard-Andersen N, Freiberg JJ and Nordestgaard BG. Only a fraction of patients with ischaemic diseases or diabetes are treated to recommended target values for plasma lipids. *Dan Med J*. 2012;59:A4470.
64. Cordero A, Galve E, Bertomeu-Martínez V, Bueno H, Fácila L, Alegría E, Cequier Á, Ruiz E and González-Juanatey JR. Trends in Risk Factors and Treatments in Patients With Stable Ischemic Heart Disease Seen at Cardiology Clinics Between 2006 and 2014. *Revista Española de Cardiología (English Edition)*. 2016;69:401-407.
65. do Rego AT, de Isla LP, Cerezo AS, Vitale G, Izarra A and Walther LAA-S. Cholesterol control according to the presence of metabolic syndrome in coronary and diabetic patients. Relationship with non-alcoholic fatty liver disease. *European journal of internal medicine*. 2014;25:438-443.
66. Barrios V, Escobar C, Murga N and Quijano JJ. Clinical profile and management of patients with chronic ischemic heart disease according to age in the population daily attended by cardiologists in Spain: the ELDERCIC study. *European journal of internal medicine*. 2010;21:180-184.
67. Kotseva K, Wood D, De Backer G, De Bacquer D, Pyörälä K, Reiner Ž, Keil U and Group ES. EUROASPIRE III. Management of cardiovascular risk factors in asymptomatic high-risk patients in general practice: cross-sectional survey in 12 European countries. *European journal of cardiovascular prevention & rehabilitation*. 2010;17:530-540.
68. Ferreras AJ, Sanjuán DR, Visiedo SS, Sarrat TM, Vicente MA, Abadía GV and Blasco VM. Analysis of the control of cardiovascular risk factors in patients with peripheral arterial disease. *Semergen*. 2013;39:63-69.
69. Frigola-Capell E, Lieshout J, Muñoz MA, Verdú-Rotellar J, Orfila F, Suñol R and Wensing M. Community programmes for coronary heart disease in Spanish primary care. *The International journal of health planning and management*. 2016;31:87-96.
70. Garzón G, Gil Á, Herrero AM, Jiménez F, Cerezo MJ and Domínguez C. Achievement of cardiovascular goals in patients diagnosed with type 2 diabetes with and without cardiovascular disease. *Gaceta sanitaria*. 2015;29:425-430.
71. Gencer B, Auer R, Nanchen D, Räber L, Klingenberg R, Carballo D, Blum M, Vogt P, Carballo S and Meyer P. Expected impact of applying new 2013 AHA/ACC cholesterol guidelines criteria on the recommended lipid target achievement after acute coronary syndromes. *Atherosclerosis*. 2015;239:118-124.

72. Gitt AK, Sonntag F, Jannowitz C, Weizel A, Karmann B, Schaefer JR, Pittrow D and Hildemann SK. Better lipid target achievement for secondary prevention through disease management programs for diabetes mellitus and coronary heart disease in clinical practice in Germany. *Current medical research and opinion*. 2016;32:417-426.
73. Hoffmann MM, Werner C, Böhm M, Laufs U and Winkler K. Association of secreted frizzled-related protein 4 (SFRP4) with type 2 diabetes in patients with stable coronary artery disease. *Cardiovascular diabetology*. 2014;13:155.
74. Mazón-Ramos P, Cordero A, González-Juanatey JR, Martínez VB, Delgado E, Vitale G and Fernández-Anaya S. Control of cardiovascular risk factors in revascularized patients with diabetes: a subanalysis of the ICP-bypass study. *Revista Española de Cardiología (English Edition)*. 2015;68:115-120.
75. Jameson K, Zhang Q, Zhao C, Ramey DR, Tershakovec AM, Gutkin SW and Marrett E. Total and low-density lipoprotein cholesterol in high-risk patients treated with atorvastatin monotherapy in the United Kingdom: analysis of a primary-care database. *Current medical research and opinion*. 2014;30:655-665.
76. Jankowski P, Czarnecka D, Łysek R, Skrzek A, Smaś-Suska M, Mazurek A, Brzozowska-Kiszka M, Wolfshaut-Wolak R, Surowiec S and Bogacki P. Secondary prevention in patients after hospitalisation due to coronary artery disease: what has changed since 2006? *Kardiologia Polska (Polish Heart Journal)*. 2014;72:355-362.
77. Laforest L, Ambegaonkar BM, Souchet T, Sazonov V and Van Ganse E. Mixed dyslipidemias in primary care patients in France. *Vascular health and risk management*. 2012;8:247.
78. Libungan B, Stensdotter L, Hjalmarson A, Attebring MF, Lindqvist J, Bäck M and Herlitz J. Secondary prevention in coronary artery disease. Achieved goals and possibilities for improvements. *International journal of cardiology*. 2012;161:18-24.
79. Balder J, Scholtens S, de Vries J, van Schie L, Boekholdt S, Hovingh G, Kamphuisen P and Kuivenhoven J. Adherence to guidelines to prevent cardiovascular diseases: The LifeLines cohort study. *Neth J Med*. 2015;73:316-23.
80. Schaefer JR, Gitt AK, Sonntag F, Weizel A, Jannowitz C, Karmann B, Pittrow D and Bestehorn K. Lipid management in 13,000 high risk cardiovascular patients treated under daily practice conditions: LIMA Registry. *Vascular health and risk management*. 2013;9:71.
81. Magalhães S, Ribeiro MM, Barreira A, Fernandes P, Torres S, Gomes JL and Viamonte S. Long-term effects of a cardiac rehabilitation program in the control of cardiovascular risk factors. *Revista Portuguesa de Cardiologia (English Edition)*. 2013;32:191-199.
82. Palomäki A, Hällberg V, Ala-Korpela M, Kovanen PT and Malminiemi K. Prompt impact of first prospective statin mega-trials on postoperative lipid management of CABG patients: a 20-year follow-up in a single hospital. *Lipids in health and disease*. 2016;15:124.
83. Pello AM, Cristóbal C, Tarín N, Huelmos A, Aceña Á, Carda R, González-Casaus ML, Alonso J, Lorenzo Ó and Blanco-Colio L. Differential profile in inflammatory and mineral metabolism biomarkers in patients with ischemic heart disease without classical coronary risk factors. *Journal of cardiology*. 2015;66:22-27.
84. Pérez dIL, Saltijeral CA, Vitale G, González TB, Torres DRA and Alvarez-Sala WL. Prevalence of inappropriate LDL cholesterol levels in patients with coronary disease and/or type 2 diabetes. *Revista clinica espanola*. 2012;212:475-481.
85. Mostaza JM, Puras E, Blasco M, Lahoz C and Samaniego ML. Utilization of Evidence-based Cardiovascular Therapies and Achievement of Therapeutic Goals in Patients With Peripheral Artery Disease. *Revista Española de Cardiología (English Edition)*. 2012;65:713-718.

86. Perrone-Filardi P, Poli A, Ambrosio G, Proto C, Chimini C and Chiariello M. Implementation of cardiovascular secondary prevention guidelines in clinical practice: a nationwide survey in Italy. *Nutrition, Metabolism and Cardiovascular Diseases*. 2012;22:149-153.
87. Pillois X, Gautier T, Bouillet B, de Barros J-PP, Jeannin A, Vergès B, Bonnet J and Lagrost L. Constitutive inhibition of plasma CETP by apolipoprotein C1 is blunted in dyslipidemic patients with coronary artery disease. *Journal of lipid research*. 2012;53:1200-1209.
88. Jameson K, Amber V, D'oca K, Mills D, Giles A and Ambegaonkar B. Impact of lipid-lowering therapy on the prevalence of dyslipidaemia in patients at high-risk of cardiovascular events in UK primary care—a retrospective database study. *International journal of clinical practice*. 2013;67:1228-1237.
89. Rallidis LS, Kotakos C, Sourides V, Varounis C, Charalampopoulos A, Zolindaki M, Dagnes N, Papadopoulos C and Anastasiou-Nana M. Attainment of optional low-density lipoprotein cholesterol goal of less than 70 mg/dl and impact on prognosis of very high risk stable coronary patients: a 3-year follow-up. *Expert opinion on pharmacotherapy*. 2011;12:1481-1489.
90. Reiner Ž and Tedeschi-Reiner E. Prevalence and types of persistent dyslipidemia in patients treated with statins. *Croatian medical journal*. 2013;54:339-345.
91. Galve E, Cordero A, Cequier A, Ruiz E and González-Juanatey JR. Degree of Lipid Control in Patients With Coronary Heart Disease and Measures Adopted by Physicians. REPAR Study. *Revista Española de Cardiología (English Edition)*. 2016;69:931-938.
92. Rizza S, Copetti M, Cardellini M, Porzio O, Luzi A, Pecchioli C, Martelli E, Valentini A, Ippoliti A and Romeo F. Atherosclerosis severity but not undiagnosed diabetes predicts new cardiovascular events of subjects in secondary cardiovascular prevention. *Atherosclerosis*. 2012;223:448-453.
93. Schnoell F, Mueller R and Kullich W. Reduction of coronary risk factors immediately and one year after inpatient rehabilitation in a highly motivated patient cohort. *European Heart Journal*. 2013;34.
94. van den Berg MJ, van der Graaf Y, de Borst GJ, Kappelle LJ, Nathoe HM, Visseren FL and Group SS. Low-Density Lipoprotein Cholesterol, Non-High-Density Lipoprotein Cholesterol, Triglycerides, and Apolipoprotein B and Cardiovascular Risk in Patients With Manifest Arterial Disease. *The American journal of cardiology*. 2016;118:804-810.
95. Hambraeus K, Lindhagen L, Tydén P, Lindahl B and Lagerqvist B. Target-attainment rates of low-density lipoprotein cholesterol using lipid-lowering drugs one year after acute myocardial infarction in Sweden. *The American journal of cardiology*. 2014;113:17-22.
96. Andrikopoulos G, Tzeis S, Nikas N, Richter D, Pipilis A, Gotsis A, Tsaknakis T, Kartalis A, Kitsiou A and Toli K. Short-term outcome and attainment of secondary prevention goals in patients with acute coronary syndrome—results from the countrywide TARGET study. *International journal of cardiology*. 2013;168:922-927.
97. Toste S, Viamonte S, Barreira A, Fernandes P, Gomes JL and Torres S. Cardiac rehabilitation in patients with type 2 diabetes mellitus and coronary disease: A comparative study. *Revista Portuguesa de Cardiologia (English Edition)*. 2014;33:599-608.
98. Tuñón J, Blanco-Colio L, Cristóbal C, Tarín N, Higuera J, Huelmos A, Alonso J, Egido J, Asensio D and Lorenzo Ó. Usefulness of a combination of monocyte chemoattractant protein-1, galectin-3, and N-terminal pro-brain natriuretic peptide to predict cardiovascular events in patients with coronary artery disease. *The American journal of cardiology*. 2014;113:434-440.
99. van Lieshout J, Grol R, Campbell S, Falcoff H, Capell EF, Glehr M, Goldfracht M, Kumpusalo E, Künzi B and Ludt S. Cardiovascular risk management in patients with coronary heart disease in primary care: variation across countries and practices. An observational study based on quality indicators. *BMC family practice*. 2012;13:96.

100. Vonbank A, Saely CH, Rein P, Sturn D and Drexel H. Current cholesterol guidelines and clinical reality: a comparison of two cohorts of coronary artery disease patients. *Swiss Med Wkly*. 2013;143:w13828.
101. Escobar C, Blanes I, Ruiz A, Vinuesa D, Montero M, Rodríguez M, Barbera G and Manzano L. Prevalence and clinical profile and management of peripheral arterial disease in elderly patients with diabetes. *European journal of internal medicine*. 2011;22:275-281.
102. Ciardullo AV, Daghigh MM, Bevini M, Feltri G, Novi D, Fattori G, Borsari S and Di Donato C. Joint and distinct risk factors associated with micro- and macrovascular complications in a cohort of type 2 diabetic patients cared through disease management. *Acta diabetologica*. 2010;47:301-308.
103. Doucet J, Le Floch J-P, Bauduceau B and Verny C. GERODIAB: glycaemic control and 5-year morbidity/mortality of type 2 diabetic patients aged 70 years and older: 1. Description of the population at inclusion. *Diabetes & metabolism*. 2012;38:523-530.
104. Salinero-Fort MÁ, San Andrés-Rebollo FJ, de Burgos-Lunar C, Abánades-Herranz JC, Carrillo-de-Santa-Pau E, Chico-Moraleja RM, Jiménez-García R, López-de-Andrés A, Gómez-Campelo P and Group M. Cardiovascular and all-cause mortality in patients with type 2 diabetes mellitus in the MADIABETES Cohort Study: Association with chronic kidney disease. *Journal of Diabetes and its Complications*. 2016;30:227-236.
105. Barquilla GA, Llisterri CJ, Prieto DM, Alonso MF, García ML, Galgo NA and Mediavilla BJ. Blood pressure control in a population of hypertensive diabetic patients treated in primary care: PRESCAP-Diabetes Study 2010. *Semergen*. 2015;41:13-23.
106. Serra N, Oliveras A, Bergoñon S, Sans L, Cobos A, Martínez P, Artigas R and Poch E. Factors associated with blood pressure control in diabetic patients treated in nephrology units. PRESIDIAB Study. *Nefrología*. 2011;31.
107. Metsärinne K, Bröijersen A, Kantola I, Niskanen L, Rissanen A, Appelroth T, Pöntynen N, Poussa T, Koivisto V and Virkamäki A. High prevalence of chronic kidney disease in Finnish patients with type 2 diabetes treated in primary care. *Primary care diabetes*. 2015;9:31-38.
108. Béliard S, Carreau V, Carrié A, Giral P, Duchêne E, Farnier M, Ferrières J, Fredenrich A, Krempf M and Luc G. Improvement in LDL-cholesterol levels of patients with familial hypercholesterolemia: can we do better? Analysis of results obtained during the past two decades in 1669 French subjects. *Atherosclerosis*. 2014;234:136-141.
109. Besseling J, Kastelein JJ, Defesche JC, Hutten BA and Hovingh GK. Association between familial hypercholesterolemia and prevalence of type 2 diabetes mellitus. *Jama*. 2015;313:1029-1036.
110. Clarke RE, Padayachee ST, Preston R, McMahon Z, Gordon M, Graham C, Crook MA and Wierzbicki AS. Effectiveness of alternative strategies to define index case phenotypes to aid genetic diagnosis of familial hypercholesterolaemia. *Heart*. 2013;99:175-180.
111. Lahoz C, Mostaza J, Pinto X, de la Cruz J, Banegas J and Pedro-Botet J. LDL-cholesterol control in patients with genetic dyslipidemia followed up by Lipid and Vascular Risk Units of the Spanish Society of Arteriosclerosis. *Clinica e investigacion en arteriosclerosis: publicacion oficial de la Sociedad Espanola de Arteriosclerosis*. 2014;27:1-8.
112. Galema-Boers J, Lenzen M, van Domburg R, van Lennep JR, van Bruchem-van de Scheur G, Sijbrands E and Langendonk J. Predicting non-adherence in patients with familial hypercholesterolemia. *European journal of clinical pharmacology*. 2014;70:391-397.
113. Huijgen R, Hutten BA, Kindt I, Vissers MN and Kastelein JJ. Discriminative ability of LDL-cholesterol to identify patients with familial hypercholesterolemia: a cross-sectional study in 26,406 individuals tested for genetic FH. *Circulation: Cardiovascular Genetics*. 2012:CIRCGENETICS. 111.962456.
114. Huijgen R, Kindt I, Verhoeven SB, Sijbrands EJ, Vissers MN, Kastelein JJ and Hutten BA. Two years after molecular diagnosis of familial hypercholesterolemia: majority on cholesterol-lowering treatment but a minority reaches treatment goal. *PLoS One*. 2010;5:e9220.

115. Jarauta E, Mateo-Gallego R, Bea AM, Crespo M, Ballester A, Rubio MV, Baila-Rueda L, Calmarza P, Cenarro A and de Groot E. Atherosclerosis progression in patients with autosomal dominant hypercholesterolemia in clinical practice. *Journal of clinical lipidology*. 2014;8:373-380.
116. Pijlman AH, Huijgen R, Verhagen S, Imholz B, Liem A, Kastelein J, Abbink E, Stalenhoef A and Visseren F. Evaluation of cholesterol lowering treatment of patients with familial hypercholesterolemia: a large cross-sectional study in The Netherlands. *Atherosclerosis*. 2010;209:189-194.
117. de Isla LP, Alonso R, Mata N, Saltijeral A, Muñoz O, Rubio-Marin P, Diaz-Diaz JL, Fuentes F, de Andrés R and Zambón D. Coronary Heart Disease, Peripheral Arterial Disease, and Stroke in Familial Hypercholesterolaemia. *Arteriosclerosis, thrombosis, and vascular biology*. 2016:ATVBAHA. 116.307514.
118. Talmud PJ, Shah S, Whittall R, Futema M, Howard P, Cooper JA, Harrison SC, Li K, Drenos F and Karpe F. Use of low-density lipoprotein cholesterol gene score to distinguish patients with polygenic and monogenic familial hypercholesterolaemia: a case-control study. *The Lancet*. 2013;381:1293-1301.
119. Brotons C, Calvo-Bonacho E, Moral I, García-Margallo MT, Cortés-Arcas MV, Puig M, Vázquez-Pirillo G and Ruilope LM. Impact of the new American and British guidelines on the management and treatment of dyslipidemia in a Spanish working population. *Revista Española de Cardiología (English Edition)*. 2014;67:906-911.
120. Hess L and Arnet D. Persistent dyslipidemia in statin-treated patients: the focus on comprehensive lipid management survey in Swiss patients. *Swiss Med Wkly*. 2011;141:w13200.
121. García-Gil M, Blanch J, Comas-Cufí M, Daunis-i-Estadella J, Bolívar B, Martí R, Ponjoan A, Alves-Cabrato L and Ramos R. Patterns of statin use and cholesterol goal attainment in a high-risk cardiovascular population: A retrospective study of primary care electronic medical records. *Journal of clinical lipidology*. 2016;10:134-142.
122. Gibson I, Flaherty G, Cormican S, Jones J, Kerins C, Walsh AM, Costello C, Windle J, Connolly S and Crowley J. Translating guidelines to practice: findings from a multidisciplinary preventive cardiology programme in the west of Ireland. *European journal of preventive cardiology*. 2014;21:366-376.
123. Haberka M, Okopień B and Gąsior Z. Obesity, ultrasound indexes of fat depots and lipid goal attainment in patients with high and very high cardiovascular risk: A novel approach towards better risk reduction. *Nutrition, Metabolism and Cardiovascular Diseases*. 2016;26:123-133.
124. Reibis R, Völler H, Gitt A, Jannowitz C, Halle M, Pittrow D and Hildemann S. Management of Patients With ST-Segment Elevation or Non-ST-Segment Elevation Acute Coronary Syndromes in Cardiac Rehabilitation Centers. *Clinical cardiology*. 2014;37:213-221.
125. Völler H, Gitt A, Jannowitz C, Karoff M, Karmann B, Pittrow D, Reibis R and Hildemann S. Treatment patterns, risk factor control and functional capacity in patients with cardiovascular and chronic kidney disease in the cardiac rehabilitation setting. *European journal of preventive cardiology*. 2014;21:1125-1133.
